# Supplementary material for: Burden of Thyroid Cancer From 1990 to 2019 and Projections of Incidence and Mortality Until 2039 in China: Findings From Global Burden of Disease Study
Source: Frontiers journal article supplement (doi:10.3389/fendo.2021.738213), 2021-10-06
Supplement: Data_Sheet_1.zip [file Data_Sheet_1.zip]

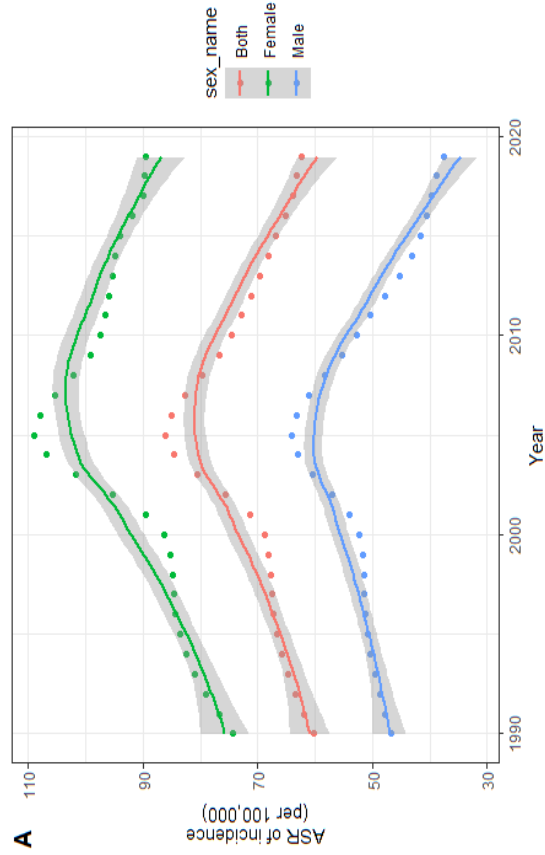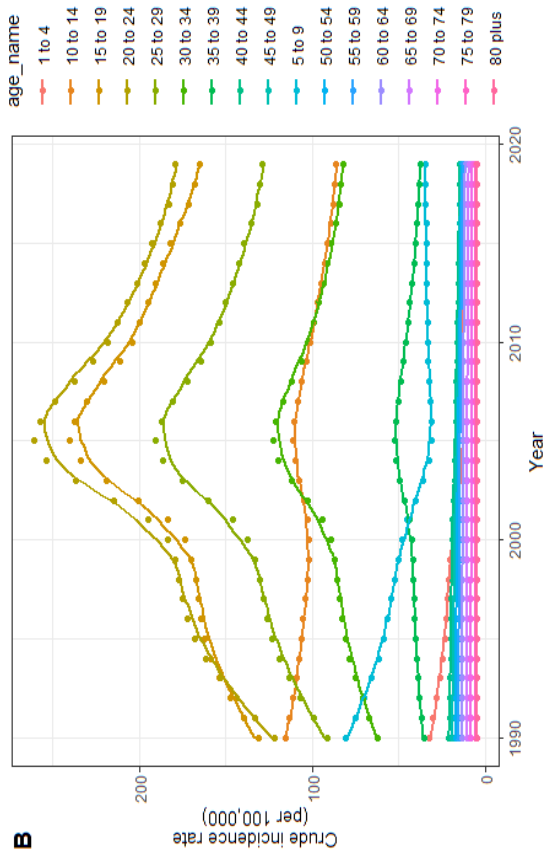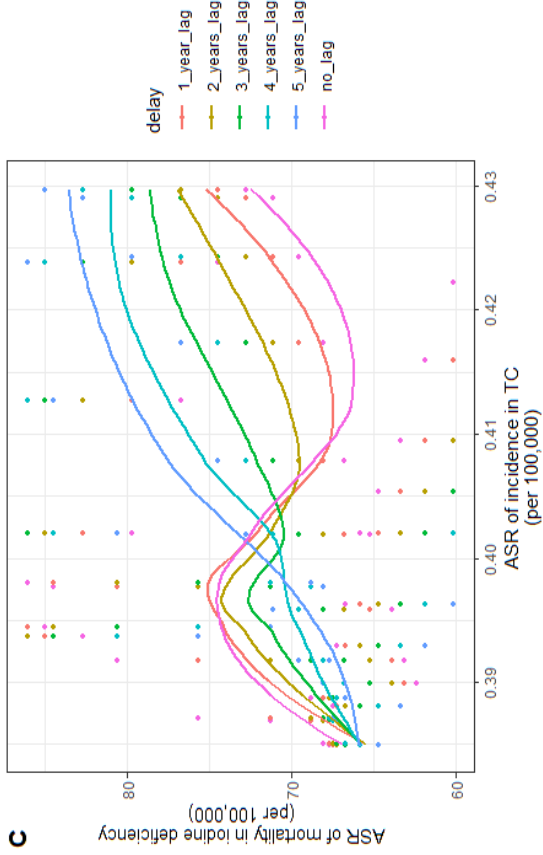

Pearson's correlation between iodine deficiency incidence and TC mortality

| Years of lag | R     | 95%CI of R   | Value of T | P      |
|--------------|-------|--------------|------------|--------|
| No lag       | -0.02 | (-0.46,0.25) | -0.63      | 0.53   |
| 1 year lag   | 0.07  | (-0.29,0.43) | 0.40       | 0.69   |
| 2 years lag  | 0.28  | (-0.10,0.59) | 1.50       | 0.14   |
| 3 years lag  | 0.49  | (0.13,0.73)  | 2.80       | <0.01  |
| 4 years lag  | 0.69  | (0.41,0.85)  | 4.63       | <0.001 |
| 5 years lag  | 0.85  | (0.69,0.93)  | 7.84       | <0.001 |
